# Supplementary material
Source: ML conference proceedings conference paper supplement (https://openreview.net/forum?id=uRJ8WAJxHC)
Supplement: supplementary_material [file Kernel_Experimentation_Presentation.pdf › DKRL-LLM/Kernel_Experimentation_Presentation.pdf]

# Kernel-Based Representation Learning for Experimentation with LLM-Generated Treatments

Lei Shi

Joint work with: David Arbour, Raghav Addanki, Ritwik Sinha, Avi Feller

2024 Summer @ Adobe Research

Presenting @ Casual Causal, 02/06/2025

# Motivation

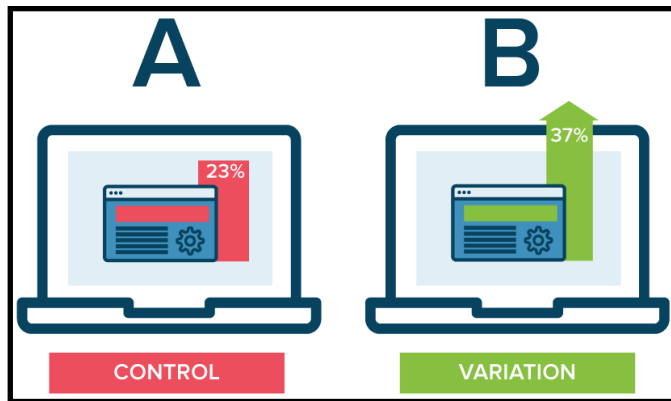

## Classical A/B testing:

- markets design treatment & control variants (website, advertisement, etc.)
- test them on different traffic of users
- **Easy testing, hard designing!**

## LLMs are the game-changer:

- markets generate a large number of variants with one simple prompt
- Test all of them on users
- **Easy designing, hard testing!**

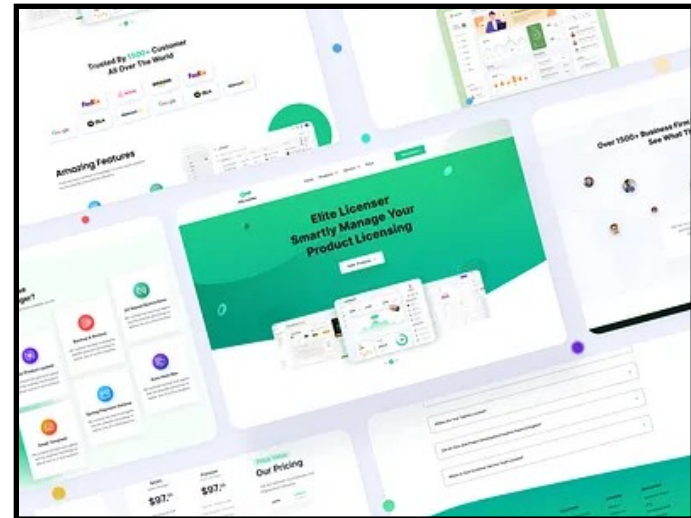

# Motivation

- Ex: Design a headline for casual causal website with GPT
- Generate ten headlines with one click!
- Can generate much more...
- But how to evaluate them?  
(Estimation)
- And how to efficiently collect data to decide the best arm?  
(Design)

I try to design a headline for one web page, which is for promoting a group in Berkeley working on causal inference. The group is casual causal. Give me ten headline for the webpage!

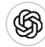

Here are ten headline ideas for the **Casual Causal** group at Berkeley, promoting their work on causal inference:

1. "Casual About the Name, Serious About Causality – Join Us at Berkeley!"
2. "Causal Inference, Without the Complications – Welcome to Casual Causal"
3. "Making Causal Inference Approachable – The Casual Causal Way"
4. "Where Rigor Meets Relaxation – Exploring Causality at Berkeley"
5. "Decoding Causal Effects, One Experiment at a Time – Join Casual Causal"
6. "Serious Causal Science, No Frills – Meet the Casual Causal Group"
7. "Causal Thinking, Without the Jargon – A Friendly Approach to Inference"
8. "From Correlation to Causation – Let's Make It Casual"
9. "Challenging Assumptions, Testing  $H_0$  Hypotheses – The Casual Causal Mindset"
10. "Join Berkeley's Chillest, Sharpest Causal Inference Community"

# Difficulty of Classical Thinking

- Ten headlines as ten discrete arms...
- Textbook-style experimental design + causal inference, with multiple treatments levels
- Problem solved! ... or no?
  - Treatments are special: text (or even other modality) as treatment
  - Inference is underpowered with a large number of arms
  - New treatments may come

# Our idea: utilize the semantic information

- **Semantic information of the treatment matters!**
  - Treatments are special: text as treatment (semantic information is encoded)
  - Inference is underpowered with a large number of arms (semantic similarity to pool information)
  - New treatments may come (semantic information for predicting the behavior)
- **Embeddings:** numerical representation of the semantic information
  - More of a CS jargon; for us maybe think of it as “covariates for treatments”

# Our idea: utilize the semantic information

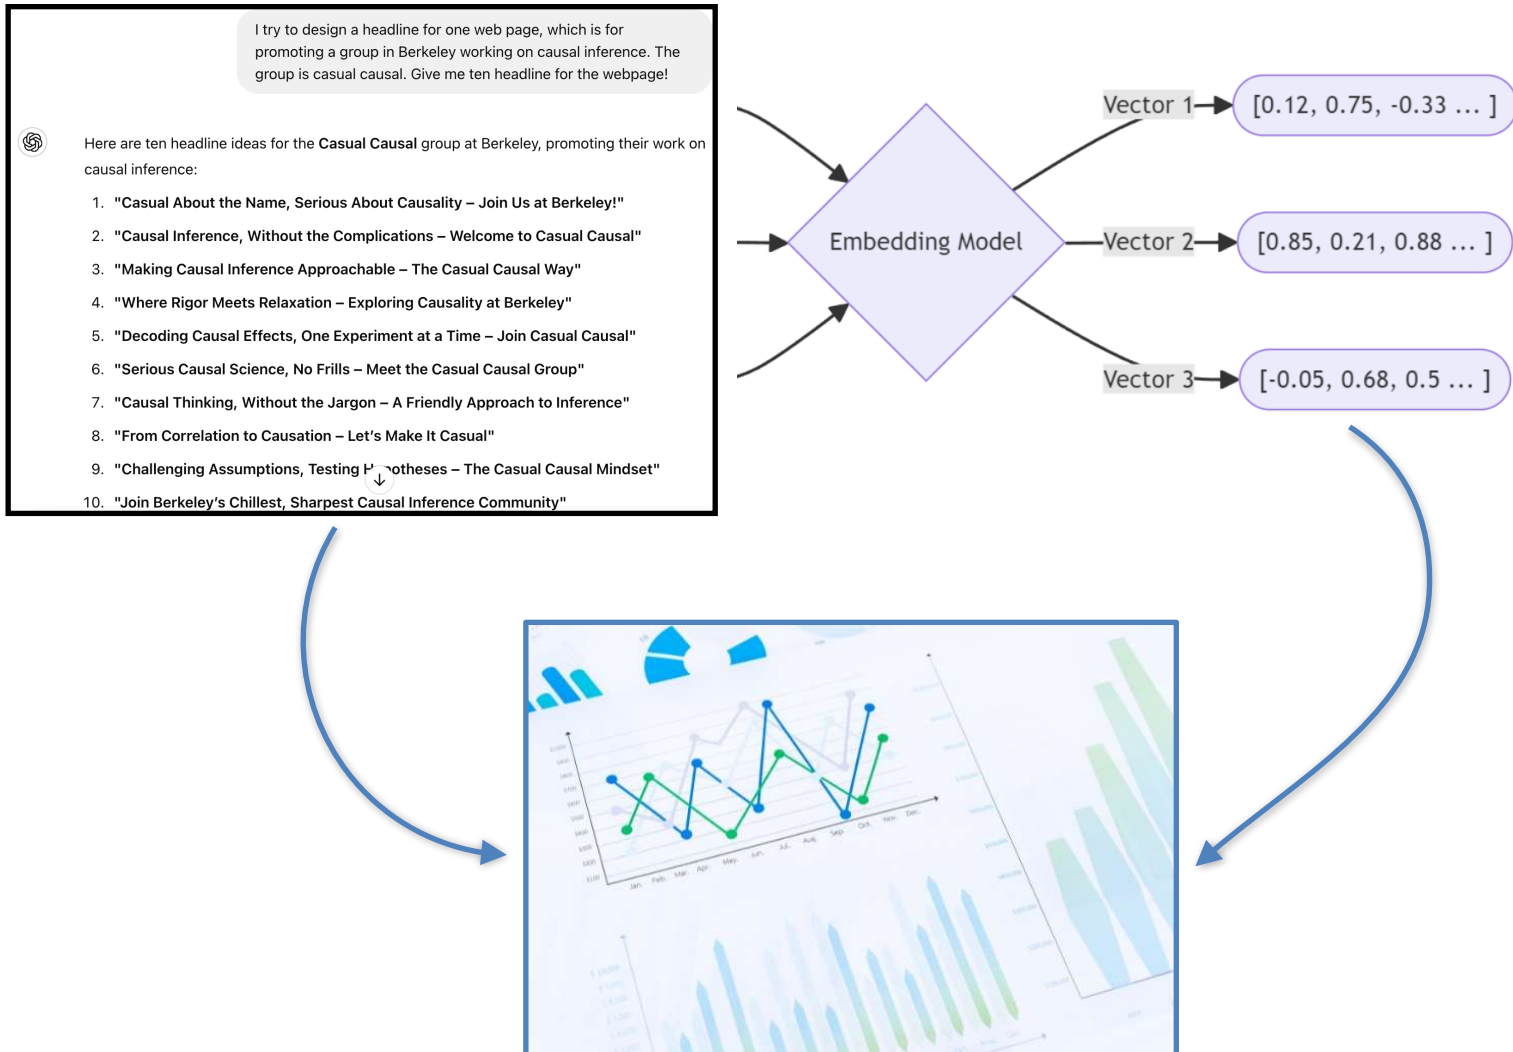

# Problem description

- A causal inference framework: consider the following structural equations:

$$y(z) = f(z, x) + \epsilon, \quad z \in \mathcal{Z}, \quad x \in \mathcal{X}.$$

- The CATE is defined as:

$$\tau(z, x) = f(z, x) - f(z_0, x).$$

- the difficulty of treating  $\mathcal{Z}$  as discrete: too many arms + no semantic information pooling!
- Instead we represent  $\mathcal{Z}$  as the embedding space
  - To note: we are focusing on estimation instead of identification issues here!

# Warm up: learning with treatment embeddings

- Consider a simple first step:  $f(z, x) = f(z)$
- **Kernel methods are standard tools for measuring similarity with continuous parametrization!**
- Examples:

Linear kernel:

$$K(\mathbf{x}^{(i)}, \mathbf{x}^{(j)}) = \mathbf{x}^{(i)T} \mathbf{x}^{(j)}$$

Polynomial kernel:

$$K(\mathbf{x}^{(i)}, \mathbf{x}^{(j)}) = \left(1 + \mathbf{x}^{(i)T} \mathbf{x}^{(j)}\right)^d$$

Radial basis functions (RBF)

$$K(\mathbf{x}^{(i)}, \mathbf{x}^{(j)}) = \exp\left(-\frac{(\mathbf{x}^{(i)} - \mathbf{x}^{(j)})^2}{\sigma^2}\right)$$

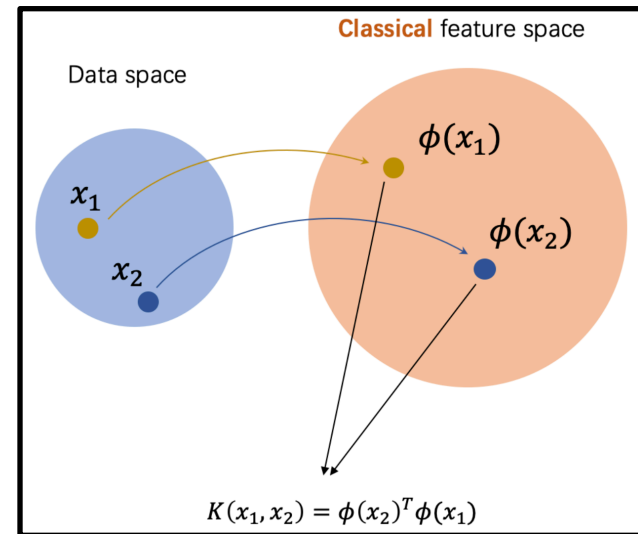



# Warm up: learning with treatment embeddings

- Start simple: how about starting from a linear similarity case? - let's run ridge! (**estimate**)

$$\hat{f}(z) = \phi(z)^\top \hat{\beta}, \quad \hat{\beta} = \frac{1}{2n} \sum_{i=1}^n \{y_i - \phi(z_i)^\top \beta\}^2 + \lambda_n \|\beta\|_2^2.$$

- Maximizing  $\hat{f}$  to identify the best arm
- Make the algorithm adaptive (**design**): put a Gaussian prior on  $\beta$  and update the posterior distribution of  $y$   
(Fancier name: Thompson Sampling!)

# Warm up: learning with treatment embeddings

- Can we move to more general nonlinear models?
- Kernel ridge regression with embeddings:

$$\hat{f} = \arg \min_{f \in \mathbb{H}_{\mathcal{K}}} \frac{1}{2n} \sum_{i=1}^n (y_i - f(z_i))^2 + \lambda_n \|f\|_{\mathbb{H}_{\mathcal{K}}}.$$

- Results in an interpolator:

$$\hat{f}(z) = \sum_{i=1}^n \hat{\alpha}_i \mathcal{K}(z, z_i).$$

- Then we can maximize  $\hat{f}$ !
- To make it adaptive: put a prior on  $f(z)$  and update posterior (**Fancy name: Gaussian Process, Bayes Opt**)

$$\begin{bmatrix} f(x_1) \\ \vdots \\ f(x_m) \end{bmatrix} \sim \mathcal{N} \left( \begin{bmatrix} m(x_1) \\ \vdots \\ m(x_m) \end{bmatrix}, \begin{bmatrix} k(x_1, x_1) & \cdots & k(x_1, x_m) \\ \vdots & \ddots & \vdots \\ k(x_m, x_1) & \cdots & k(x_m, x_m) \end{bmatrix} \right).$$

# Our goal: Incorporating customer covariates

- Hope to extend the idea to incorporate covariates
- For  $n$  customers, the expected potential outcome matrix is:

$$\begin{pmatrix} f(z_1, x_1) & \dots & f(z_1, x_n) \\ \vdots & \ddots & \vdots \\ f(z_n, x_1) & \dots & f(z_n, x_n) \end{pmatrix}$$

- Ideal world: Multi-task Gaussian process
- Reality: Many missing pairs!

# Incorporating covariates

- Let's Revisit estimation of CATE: R-learner by Nie & Wager

- For binary treatment: partial linear model

$$y = f(z_0, x) + \mathbf{1}\{z = z_1\} \cdot \tau(x) + \epsilon.$$

- a decomposition of treatment effects
- Conditioning on covariates:

$$y = m(x) + (\mathbf{1}\{z = z_1\} - e(x)) \cdot \tau(x) + \epsilon.$$

- Learn the function  $\tau(x)$

# Incorporating covariates

- Mimicking the idea
  - For general treatment: partial linear model

$$y = f(z_0, x) + \mathbf{g}(z)^\top \mathbf{h}(x) + \epsilon.$$

- A decomposition of treatment effects into low-dimensional summary with unknown **representations**  $\mathbf{g}, \mathbf{h}$ !
- Conditioning on covariates:

$$m(x) = f(z_0, x) + \bar{\mathbf{g}}(x)^\top \mathbf{h}(x).$$

$$y = m(x) + (\mathbf{g}(z) - \bar{\mathbf{g}}(x))^\top \mathbf{h}(x) + \epsilon.$$

- **Need to learn both  $\mathbf{g}(z)$  and  $\mathbf{h}(x)$ !**

# Incorporating covariates

- Let's simplify the problem: Experimental data where propensity score does not depend on  $x$ 
  - No dependence of  $\bar{g}(x)$  on  $x$ :

$$y = m(x) + (\mathbf{g}(z) - \bar{\mathbf{g}})^\top \mathbf{h}(x) + \epsilon.$$

- We can assume  $g \in \mathbb{H}(\mathcal{K}_g)$  and  $h \in \mathbb{H}(\mathcal{K}_h)$
- A natural extension of the kernel ridge:

$$(\hat{\mathbf{g}}, \hat{\mathbf{h}}) = \arg \min_{\{g_l, h_l\}_{l=1}^r} \frac{1}{2n} \sum_{i=1}^n \left\{ y_i - \sum_{l=1}^r g_l(z_i) h_l(x_i) \right\}^2 + \lambda_n \sum_{l=1}^r (\|g_l\|_{\mathcal{K}_g}^2 + \|h_l\|_{\mathcal{K}_h}^2).$$

**Double Kernel  
Representation  
Learning**

# Double Kernel Representation Learning

- How to solve this from data?
- **A representer theorem:**
  - Representing the RKHS elements by function bases constructed from data
  - Two kernels and two functions:

$$U = [U_1^R, \dots, U_n^R]^\top \in \mathbb{R}^{n \times r},$$
$$V = [V_1^R, \dots, V_n^R]^\top \in \mathbb{R}^{n \times r},$$

$$\hat{g}(z) = \sum_{i \in [n]} U_i^R \mathcal{K}_g(z, z_i), \quad \hat{h}(x) = \sum_{i \in [n]} V_i^R \mathcal{K}_h(x, x_i),$$

$$f(z, x) = \sum_{i \in [n]} \sum_{j \in [n]} \langle U_i^R, V_j^R \rangle \mathcal{K}_g(z, z_i) \mathcal{K}_h(x, x_j)$$
$$= \mathcal{K}_g(z, \mathbf{z}_{1:n}) \Theta \mathcal{K}_h(x, \mathbf{x}_{1:n})^\top,$$

- $U, V$  can be solved from an alternating algorithm
- Statistical convergence under a fixed-base setting

# An Adaptive Experimentation Strategy

- Explore-then-commit for adaptive treatment allocation
  - Initial  $T_e$  stages (exploration) - randomly sample treatment and users to learn the outcome function
  - Following  $T_c$  stages (exploitation) - randomly draw a user, and assign her to the best estimated treatment
- A sublinear gap between realized outcomes and optimal (regret)

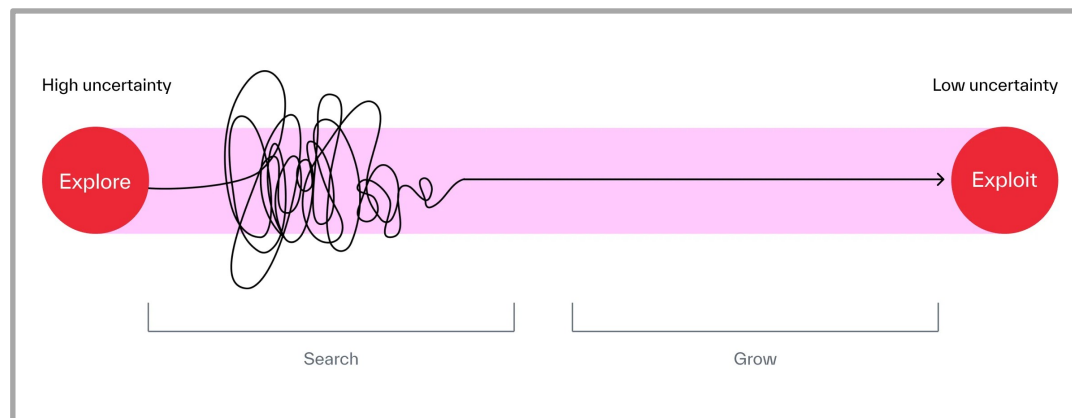



# Synthetic Simulation: Upworthy Research Archive

- **Upworthy Research Archive:** an open dataset of thousands of A/B tests of headlines conducted by Upworthy from January 2013 to April 2015.
- Contains headlines of the ads on the website and customer reactions
- We generate synthetic data from Upworthy:
  - Get embeddings of the headlines from sentence transformer
  - Simulate covariates from multivariate gaussian
  - Generate outcome from a bilinear low rank model:

$$f(z, x) = z^{\top} \Theta^* x$$

# Synthetic Simulation: Upworthy Research Archive

- Compare four methods: (i) DKRL; (ii) treatment only; (iii) covariate only; (iv) Product kernel

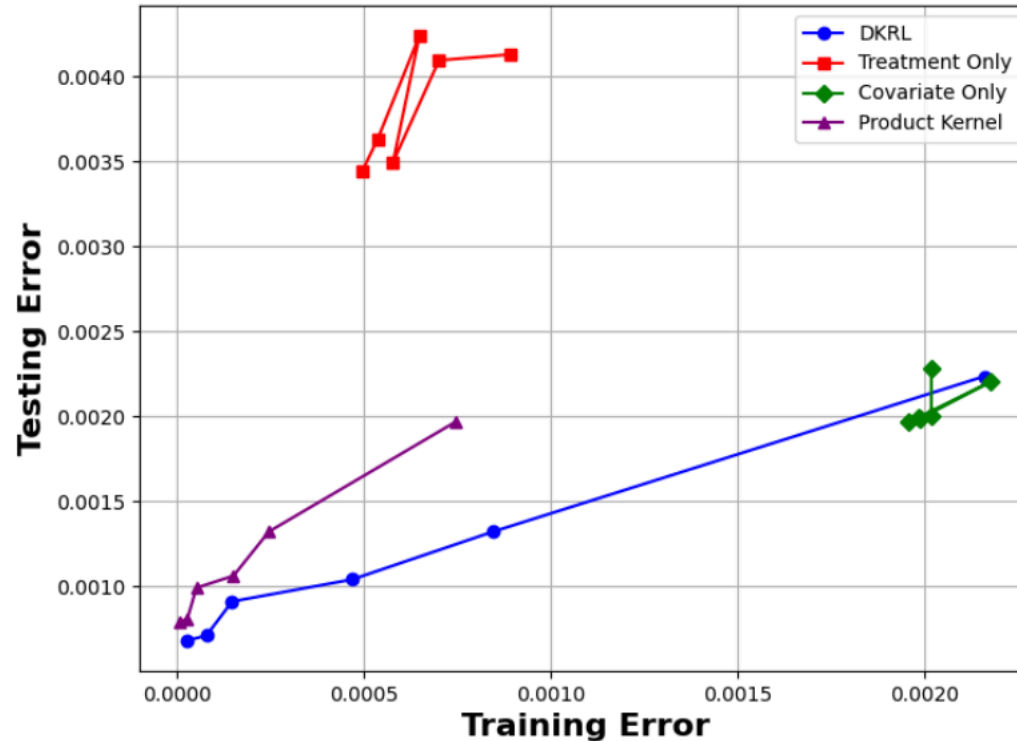

# Synthetic Simulation: Upworthy Research Archive

- DKRL learns the low dimensional representation of the data

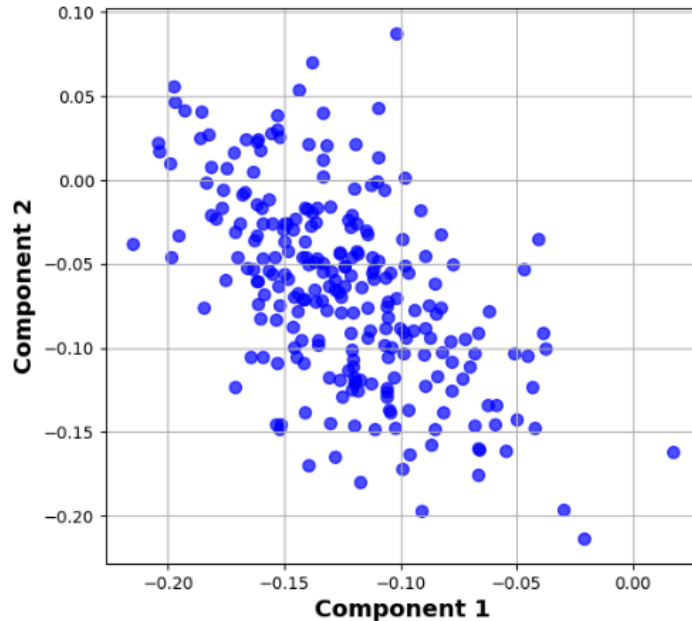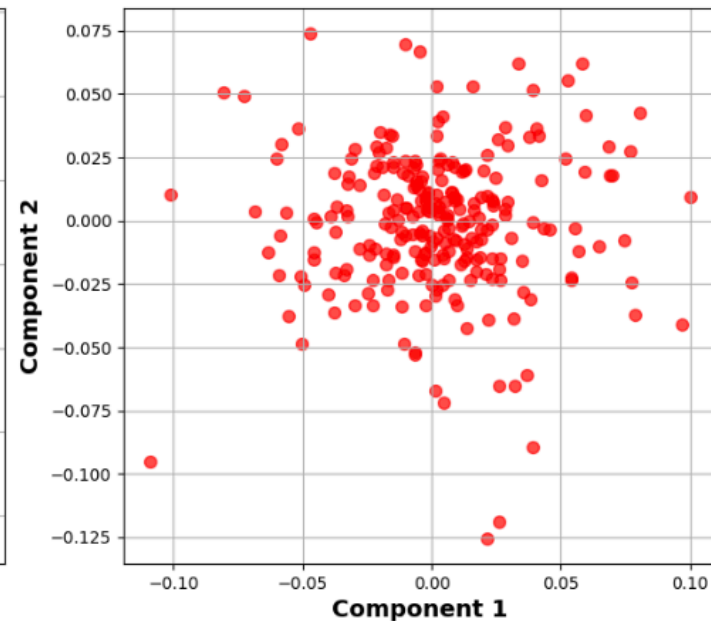

# Synthetic Simulation: Upworthy Research Archive

- Explore-then-commit with DKRL has a sublinear regret

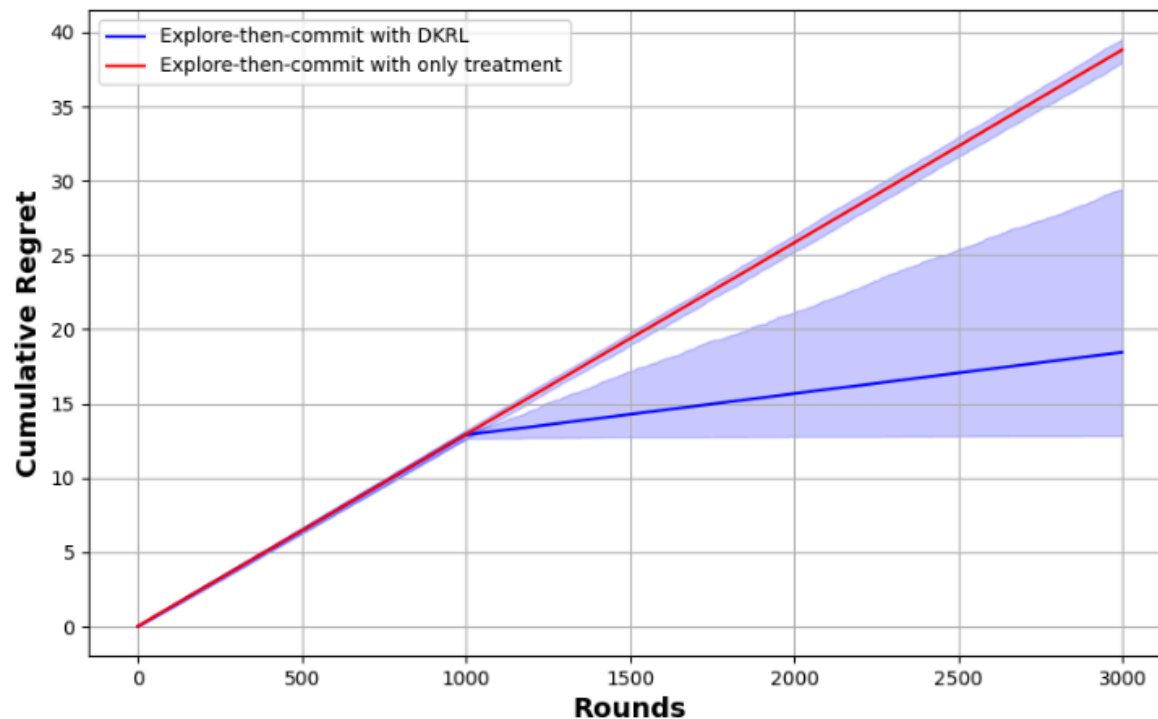

# Conclusion and Future Directions

- DKRL improves statistical efficiency in the design and analysis of LLM-generated treatment experiments.
- Possible extension: Handling delayed responses, privacy concerns, and network interference.

# **APPENDIX**

# Connection with classical methods

- The fixed-base version: low rank matrix factorization
- The Gaussian process version: Kernelized probability matrix factorization
-
